# Supplementary material for: A novel synthetic strategy for hydroxyl-terminated polybutadiene containing high cis-1,4 contents based on a Ni(ii)-coordinated anionic initiating system
Source: Royal Society of Chemistry journal article supplement (doi:10.1039/c9ra04531g), 2019-01-01
Supplement: c9ra04531g1.pdf [file c9ra04531g1.pdf]

**Table S1 the effect of Li/B to polymer properties**

| Li/B | conversion | $M_n$<br>( $\text{g}\cdot\text{mol}^{-1}$ ) | $M_w/M_n$ | hydroxyl value<br>( $\text{mmol}\cdot\text{g}^{-1}$ ) | <i>cis</i> -1,4 |
|------|------------|---------------------------------------------|-----------|-------------------------------------------------------|-----------------|
| 5:2  | 36%        | 91831                                       | 1.6       | 0.0207                                                | 85%             |
| 1:2  | 94%        | 87392                                       | 1.3       | 0.0224                                                | 96%             |
| 1:3  | 95%        | 64633                                       | 1.5       | 0.0282                                                | 95%             |
| 1:4  | 98%        | 58678                                       | 1.9       | 0.0273                                                | 96%             |
| 1:8  | 97%        | 37696                                       | 2.3       | 0.0364                                                | 97%             |

**polymerization condition: Nickel naphthenate  $2\times 10^{-5}$ mol, Bd (15wt%,n-hexane)**

**10ml, Li/Ni=10:1, 50°C, 4h.**

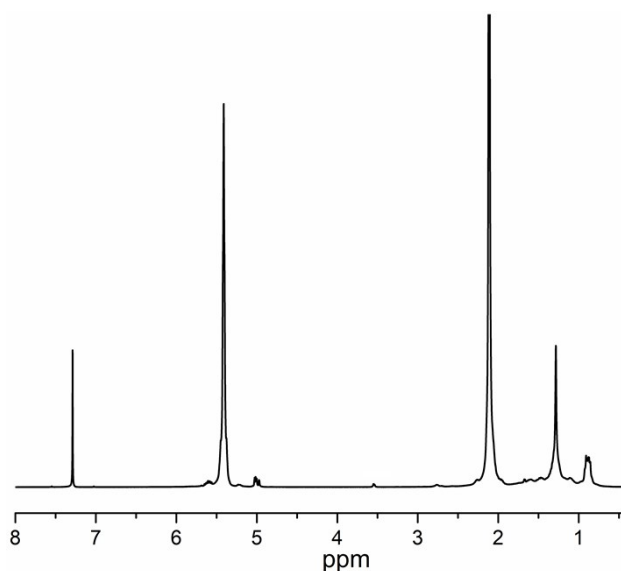

**Figure S1 the <sup>1</sup>H NMR spectrum of HTPB (polymerization process: nickel naphthenate  $2\times 10^{-5}$ mol, Bd (15wt%,n-hexane) 10ml, Li/Ni=10:1, Li/B=5:2, 50°C, 4h )**

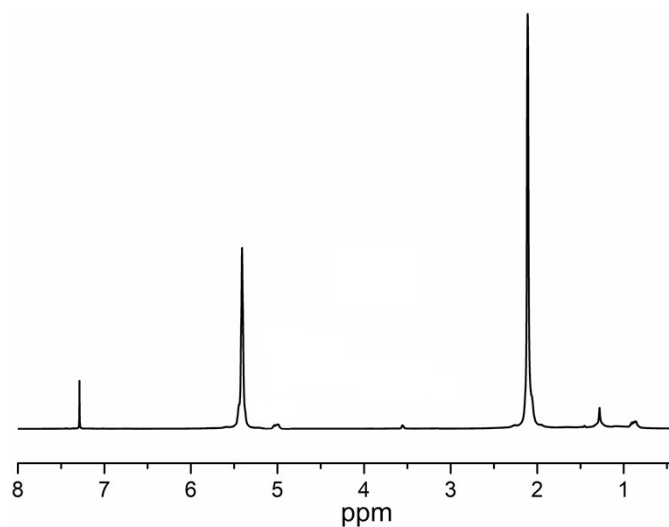

**Figure S2 the <sup>1</sup>H NMR spectrum of HTPB (polymerization process: nickel naphthenate  $2 \times 10^{-5}$  mol, Bd (15wt%,n-hexane) 10ml, Li/Ni=10:1, Li/B=1:2, 50°C, 4h )**

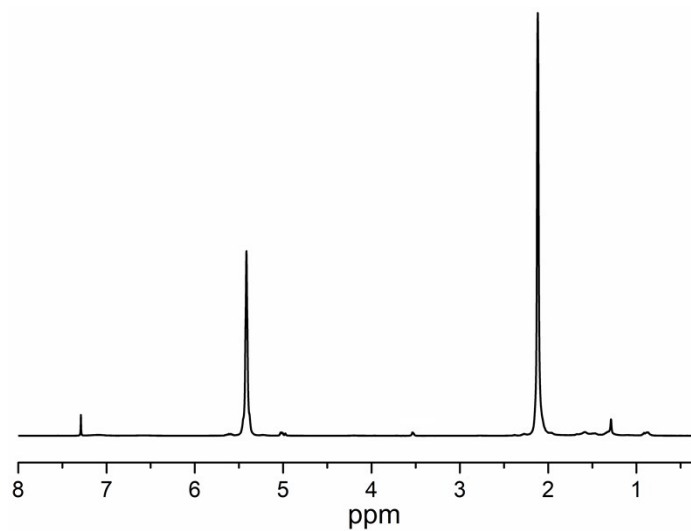

**Figure S3 the <sup>1</sup>H NMR spectrum of HTPB (polymerization process: nickel naphthenate  $2 \times 10^{-5}$  mol, Bd (15wt%,n-hexane) 10ml, Li/Ni=10:1, Li/B=1:3, 50°C, 4h )**

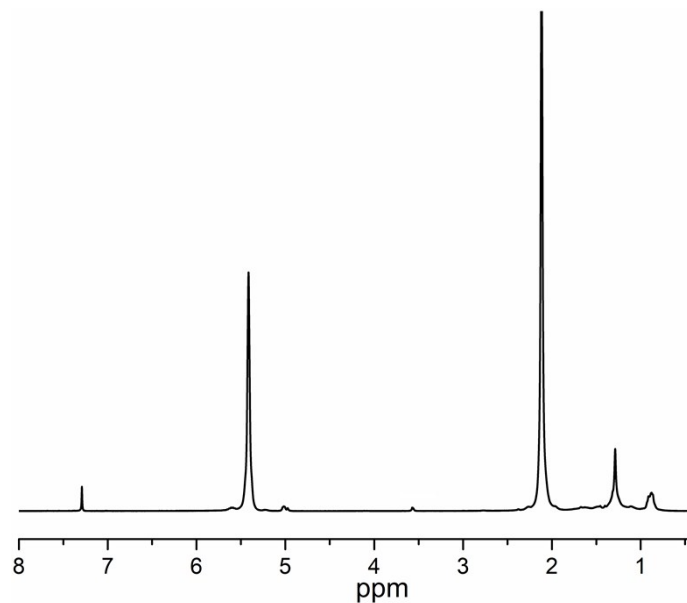

**Figure S4** the  $^1\text{H}$  NMR spectrum of HTPB (polymerization process: nickel naphthenate  $2 \times 10^{-5}$  mol, Bd (15wt%,n-hexane) 10ml, Li/Ni=10:1, Li/B=1:4, 50°C, 4h )

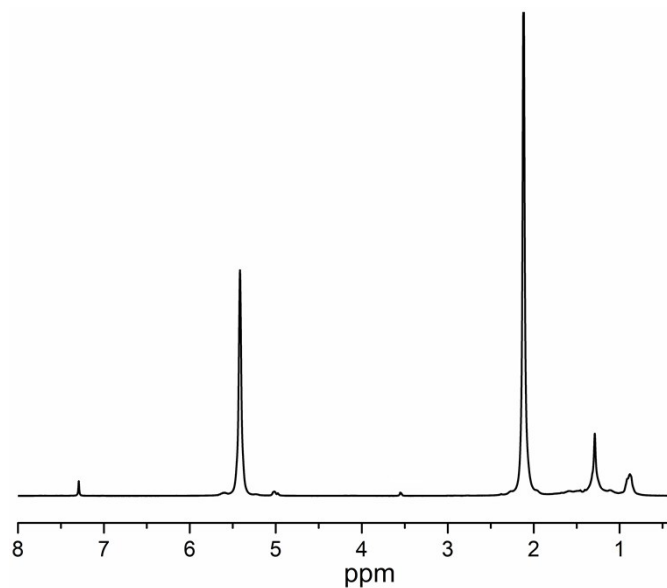

**Figure S5** the  $^1\text{H}$  NMR spectrum of HTPB (polymerization process: nickel naphthenate  $2 \times 10^{-5}$  mol, Bd (15wt%,n-hexane) 10ml, Li/Ni=10:1, Li/B=1:8, 50°C, 4h )

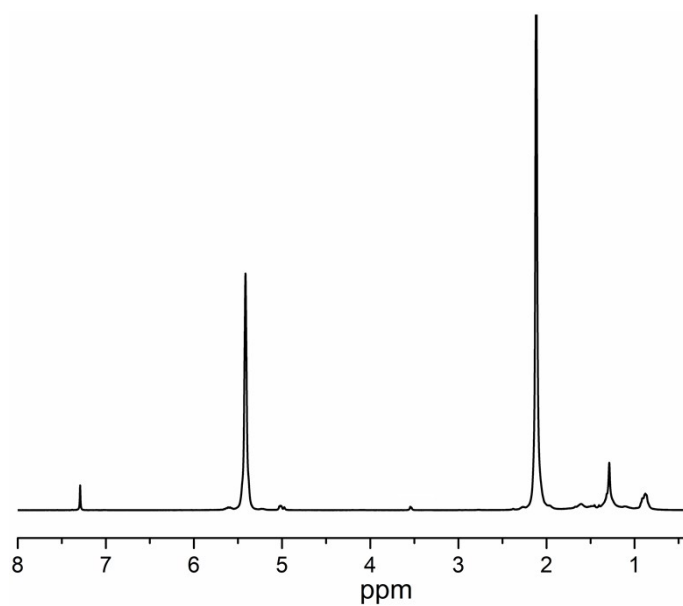

**Figure S6** the  $^1\text{H}$  NMR spectrum of HTPB (polymerization process: nickel naphthenate  $2 \times 10^{-5}$  mol, Bd (15wt%,n-hexane) 10ml, Li/Ni=2.5:1, Li/B=1:2, 50°C, 4h )

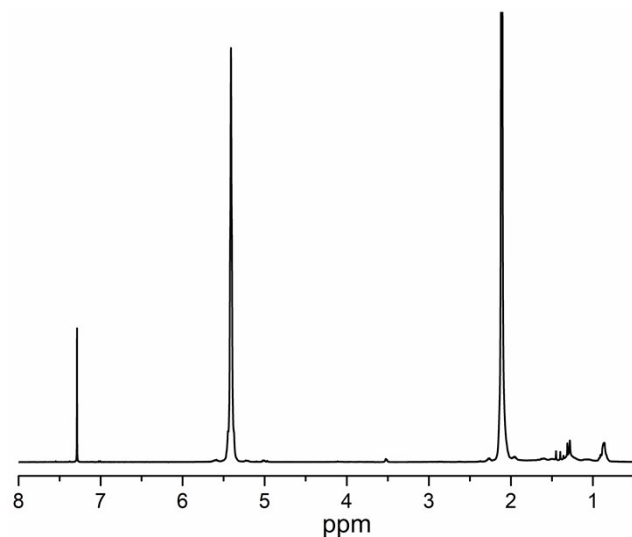

**Figure S7** the  $^1\text{H}$  NMR spectrum of HTPB (polymerization process: nickel naphthenate  $2 \times 10^{-5}$  mol, Bd (15wt%,n-hexane) 10ml, Li/Ni=5:1, Li/B=1:2, 50°C, 4h )

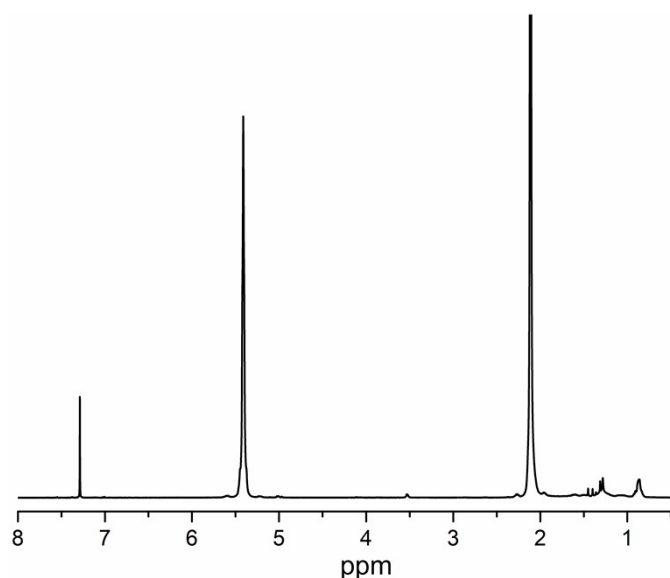

**Figure S8** the  $^1\text{H}$  NMR spectrum of HTPB (polymerization process: nickel naphthenate  $2 \times 10^{-5}$  mol, Bd (15wt%,n-hexane) 10ml, Li/Ni=10:1, Li/B=1:2, 50°C, 4h )

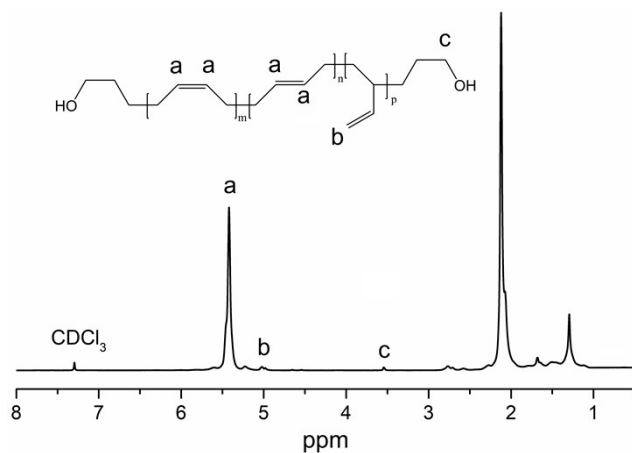

**Figure S9** the  $^1\text{H}$  NMR spectrum of HTPB (polymerization process: nickel naphthenate  $2 \times 10^{-5}$  mol, Bd (15wt%,n-hexane) 10ml, Li/Ni=20:1, Li/B=1:2, 50°C, 4h )

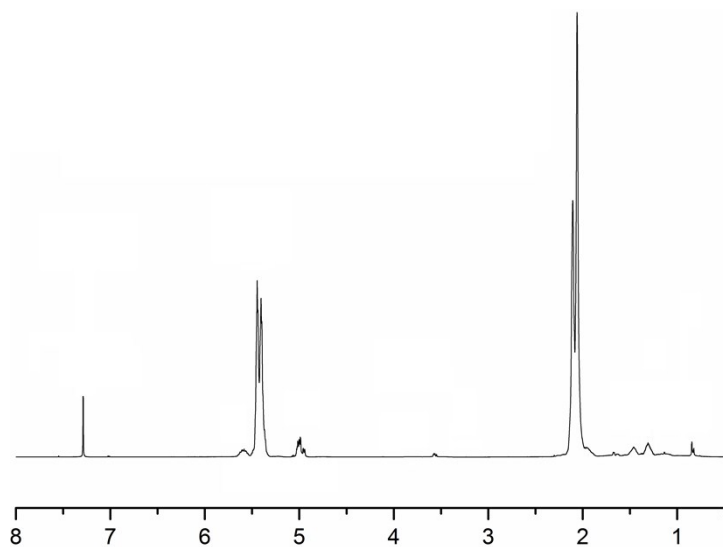

**Figure S10 the <sup>1</sup>H NMR spectrum of HTPB (polymerization process: Li amount:  $2 \times 10^{-5}$  mol, Bd (15wt%,n-hexane) 10ml, 50°C, 4h.)**

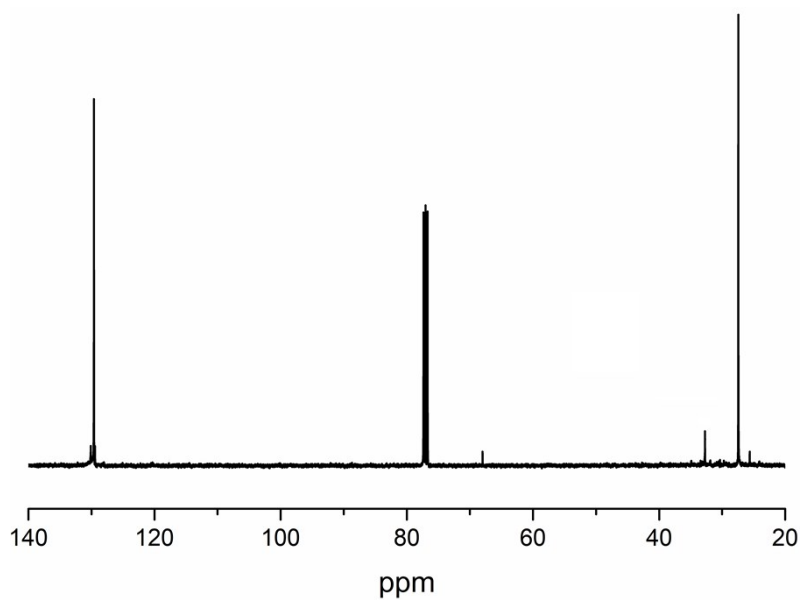

**Figure S11 the <sup>13</sup>C NMR spectrum of HTPB (polymerization process: nickel naphthenate  $2 \times 10^{-5}$  mol, Bd (15wt%,n-hexane) 10ml, Li/Ni=10:1, Li/B=5:2, 50°C, 4h )**

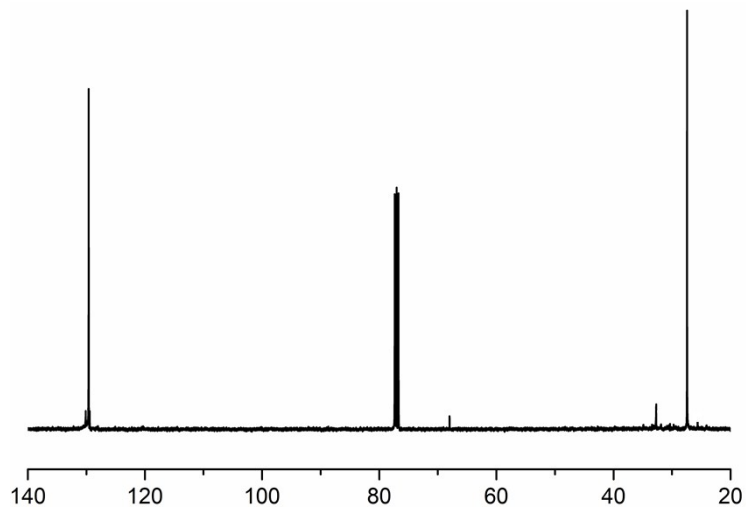

**Figure S12 the <sup>13</sup>C NMR spectrum of HTPB (polymerization process: nickel naphthenate  $2 \times 10^{-5}$  mol, Bd (15wt%,n-hexane) 10ml, Li/Ni=10:1, Li/B=1:2, 50°C, 4h )**

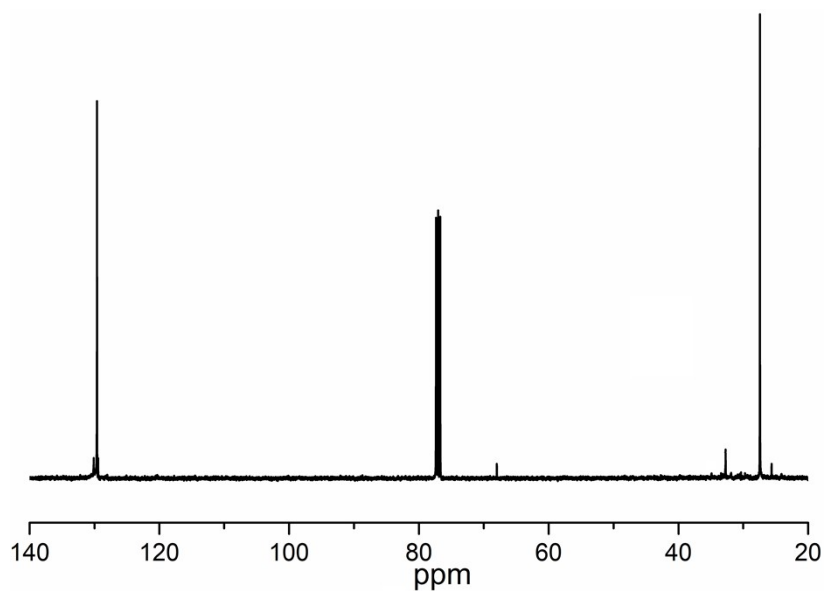

**Figure S13 the <sup>13</sup>C NMR spectrum of HTPB (polymerization process: nickel naphthenate  $2 \times 10^{-5}$  mol, Bd (15wt%,n-hexane) 10ml, Li/Ni=10:1, Li/B=1:3, 50°C, 4h )**

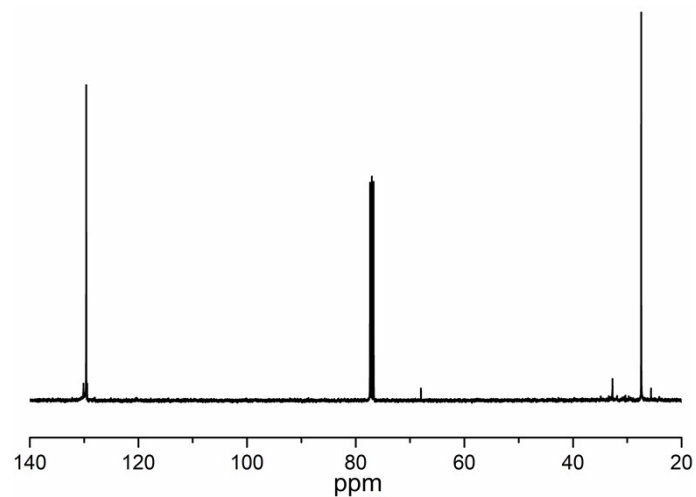

**Figure S14 the <sup>13</sup>C NMR spectrum of HTPB (polymerization process: nickel naphthenate  $2 \times 10^{-5}$  mol, Bd (15wt%,n-hexane) 10ml, Li/Ni=10:1, Li/B=1:4, 50°C, 4h )**

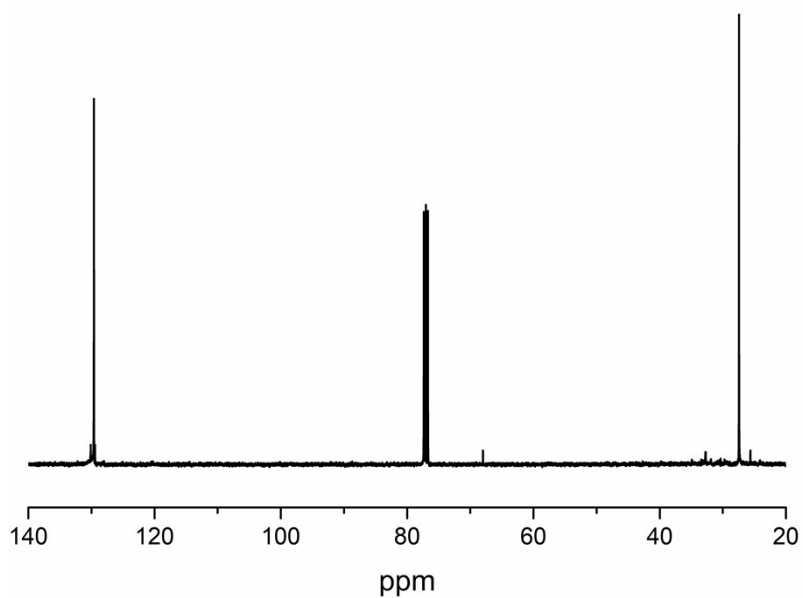

**Figure S15 the <sup>13</sup>C NMR spectrum of HTPB (polymerization process: nickel naphthenate  $2 \times 10^{-5}$  mol, Bd (15wt%,n-hexane) 10ml, Li/Ni=10:1, Li/B=1:8, 50°C, 4h )**

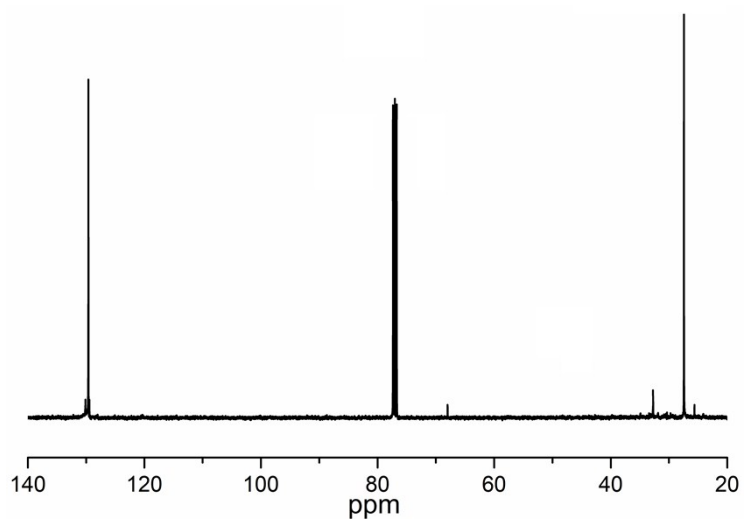

**Figure S16 the <sup>13</sup>C NMR spectrum of HTPB (polymerization process: nickel naphthenate  $2 \times 10^{-5}$  mol, Bd (15wt%,n-hexane) 10ml, Li/Ni=2.5:1, Li/B=1:2, 50°C, 4h )**

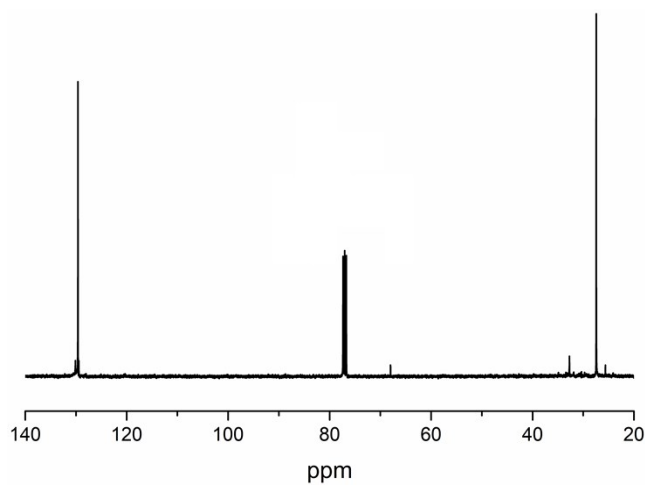

**Figure S17 the <sup>13</sup>C NMR spectrum of HTPB (polymerization process: nickel naphthenate  $2 \times 10^{-5}$  mol, Bd (15wt%,n-hexane) 10ml, Li/Ni=5:1, Li/B=1:2, 50°C, 4h )**



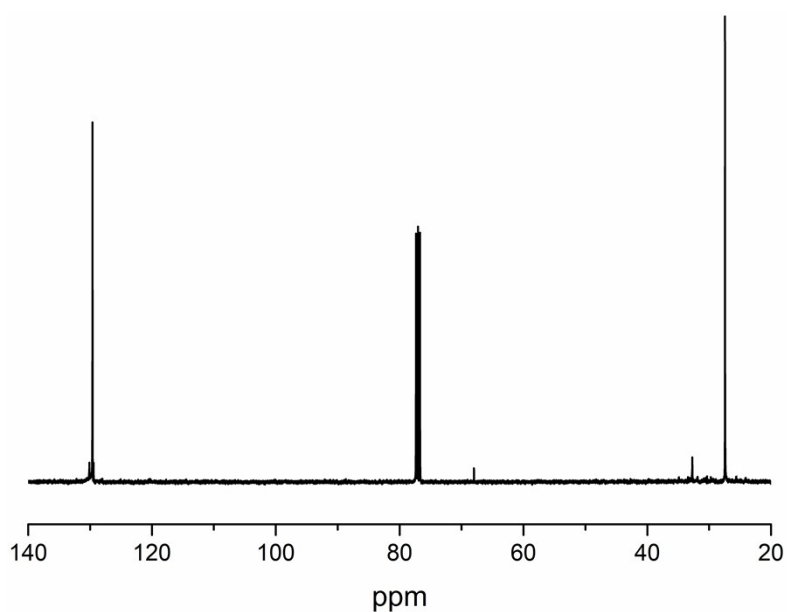

**Figure S18** the <sup>13</sup>C NMR spectrum of HTPB (polymerization process: nickel naphthenate  $2 \times 10^{-5}$  mol, Bd (15wt%,n-hexane) 10ml, Li/Ni=10:1, Li/B=1:2, 50°C, 4h )

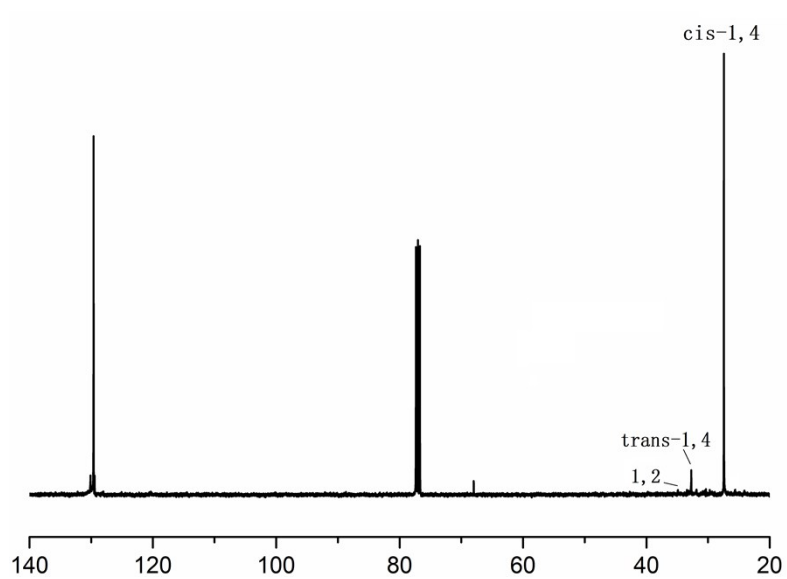

**Figure S19** the <sup>13</sup>C NMR spectrum of HTPB (polymerization process: nickel naphthenate  $2 \times 10^{-5}$  mol, Bd (15wt%,n-hexane) 10ml, Li/Ni=20:1, Li/B=1:2, 50°C, 4h )

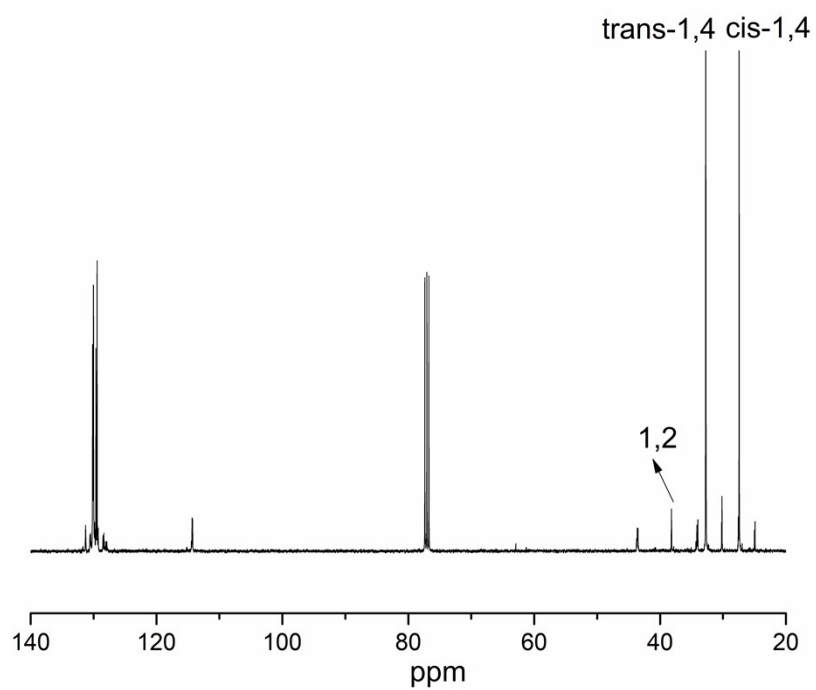

**Figure S20 the  $^{13}\text{C}$  NMR spectrum of HTPB (polymerization process: Li amount:  $2 \times 10^{-5}$  mol, Bd (15wt%,n-hexane) 10ml, 50°C, 4h)**
